# Supplementary material
Source: publisher site journal article supplement (https://www.spandidos-publications.com/2307/downloadSupplementary)
Supplement: Supplementary file 1 [file downloadSupplementary]

## Sheet: Supplementary table III
Table SIII. qPCR primers
ABRACL-F: TGGAGGAAATTCATCGTTTGGG
ABRACL-R: TCATCATGAACACCTTGCAGA
CXorf38-F: GTTTCAGCCTCAGTGTCAGG
CXorf38-R: TTTGTCTGCTAGTCCTCGGG
EMP1-F: TTCTGTGTCATTGCCCTCCT
EMP1-R: GACCAGATAGAGAACGCCGA
HSPB6-F: CCTCTTTGACCAGCGCTTC
HSPB6-R: CGTCTAGCAGCACCGAAAAG
PTPN6-F: CGCCCAGTTCATTGAAACCA
PTPN6-R: GGAACCCTTGCTCTTCTCCT
SPRN-F: CTGGAGGACGAGGAGGAC
SPRN-R: CAGATGTGGTCCCCGAGC
TRIM38-F: CTGGGAAGCCTCATTGAAGC
TRIM38-R: GCTTTTCCTTGTAGCCCTGG
ZNF182-F: CAAAGAGGGAACAGGGGCTA
ZNF182-R: CGGGCATTCTTCTACCTCCA
ZNF195-F: TTGTCTTGAACTCCTGGGCT
ZNF195-R: CTGGCAGAAGGTCTTGGGTA
ZNF524-F: CTTTACAGAGGCCAACACGC
ZNF524-R: CTCTGTCTCCTCCTCCTCCT
LIPT1-F: GCTCTGAATGCTGTCCAACC
LIPT1-R: GCATTGCTCCTGATCCCTTG
MITD1-F: GCTAAAGCGGGCAGTAGAAC
MITD1-R: TGTTTTCCGCTCTGTCCATG
EHBP1-F: GCTGCCCAGAAAGCTGTAAC
EHBP1-R: TATCGCTGCCTTCTCCTCAT
GAPDH-F: CCAGAACATCATCCCTGCCT
GAPDH-R: CCTGCTTCACCACCTTCTTG
